# Supplementary material for: Negative selection of human T cells recognizing a naturally-expressed tissue-restricted antigen in the human thymus
Source: PubMed Central journal article supplement — J Transl Autoimmun. 2020 Aug 9;3:100061. doi: 10.1016/j.jtauto.2020.100061 (PMC7451786; doi:10.1016/j.jtauto.2020.100061), 2020-08-09
Supplement: mmc1.pdf [file mmc1.pdf]

**Supplementary Table 1. Antibodies Used for Flow Cytometry**

| Antigen                  | Clone         |
|--------------------------|---------------|
| Human CD45               | HI30          |
| Human CD19               | HIB19         |
| Human CD3                | SP34-2        |
| Human CD4                | SK3           |
| Human CD8                | RPA-T8        |
| Human PD1                | EH12.1        |
| Human CD1a               | HI149         |
| Human CCR7               | GO43H7        |
| Human TCR V $\beta$ 11   | IG125         |
| Human TCR V $\beta$ 6-5  | IMMU 222      |
| Human TCR V $\beta$ 19-1 | E17.5F3.15.13 |
| Human TCR V $\beta$ 5-1  | IMMU 157      |
| Human TCR $\alpha\beta$  | IP26          |
| FITC                     | NAWESLEE      |

### Supplementary Table 2. Total Mice Grafted

The table shows the total number of mice grafted and the number of mice analyzed in this report in parentheses. Only mice with single positive and double positive cells in the thymus graft were included in this report and the remaining animals were considered to be engraftment failures, which is not uncommon in this model, especially when HSCs undergo lentiviral transduction.

|                 | <b>HLA-DQ8+ HSCs</b> | <b>HLA-DQ8- HSCs</b> |
|-----------------|----------------------|----------------------|
| <b>Clone 5</b>  | <b>10 (4)</b>        | <b>6 (6)</b>         |
| <b>GFP-Only</b> | <b>6 (4)</b>         | <b>4 (2)</b>         |

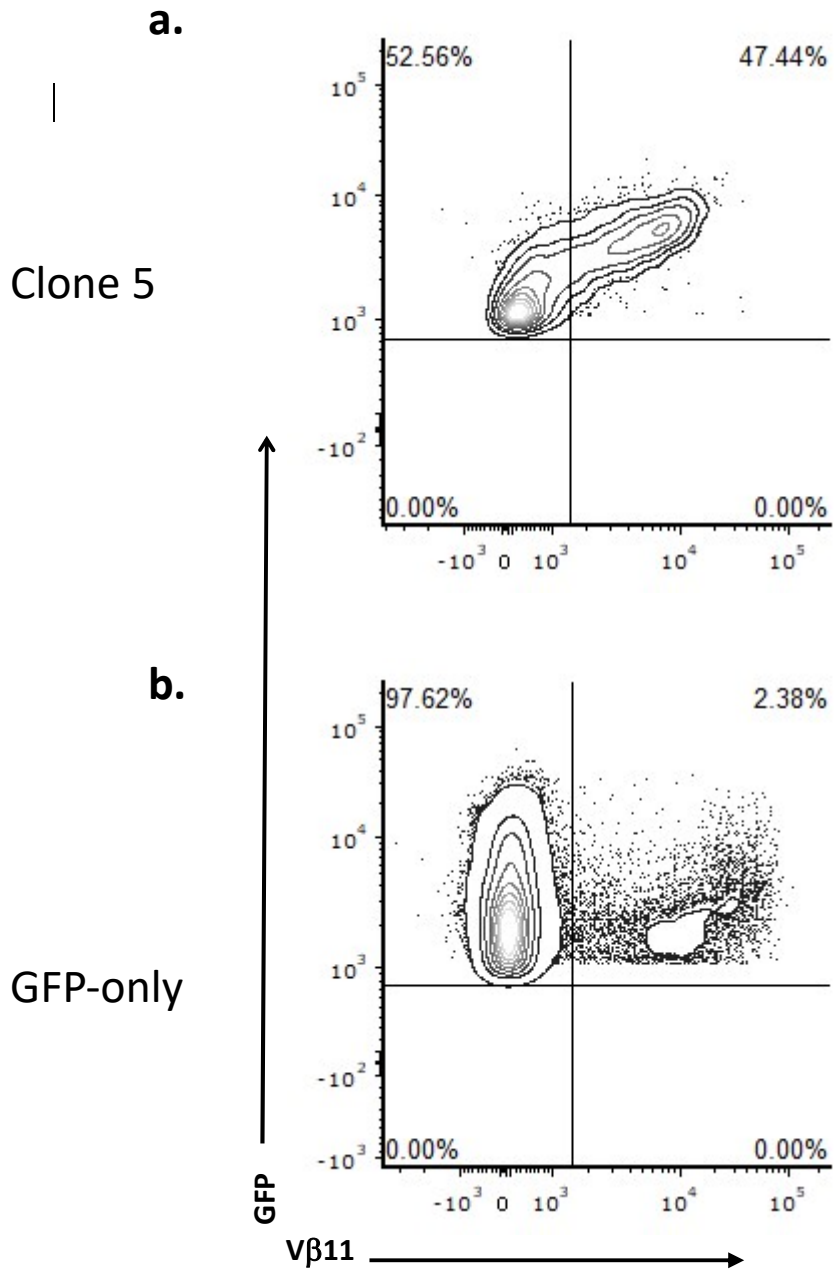

**Supplementary Figure 1. TCR expression correlates with GFP expression in thymocytes of mice receiving Clone 5-transduced HSCs.** Representative flow cytometry plots of GFP<sup>+</sup> thymocytes from mice transplanted with **a.** Clone 5 or **b.** GFP-only transduced cells are shown.

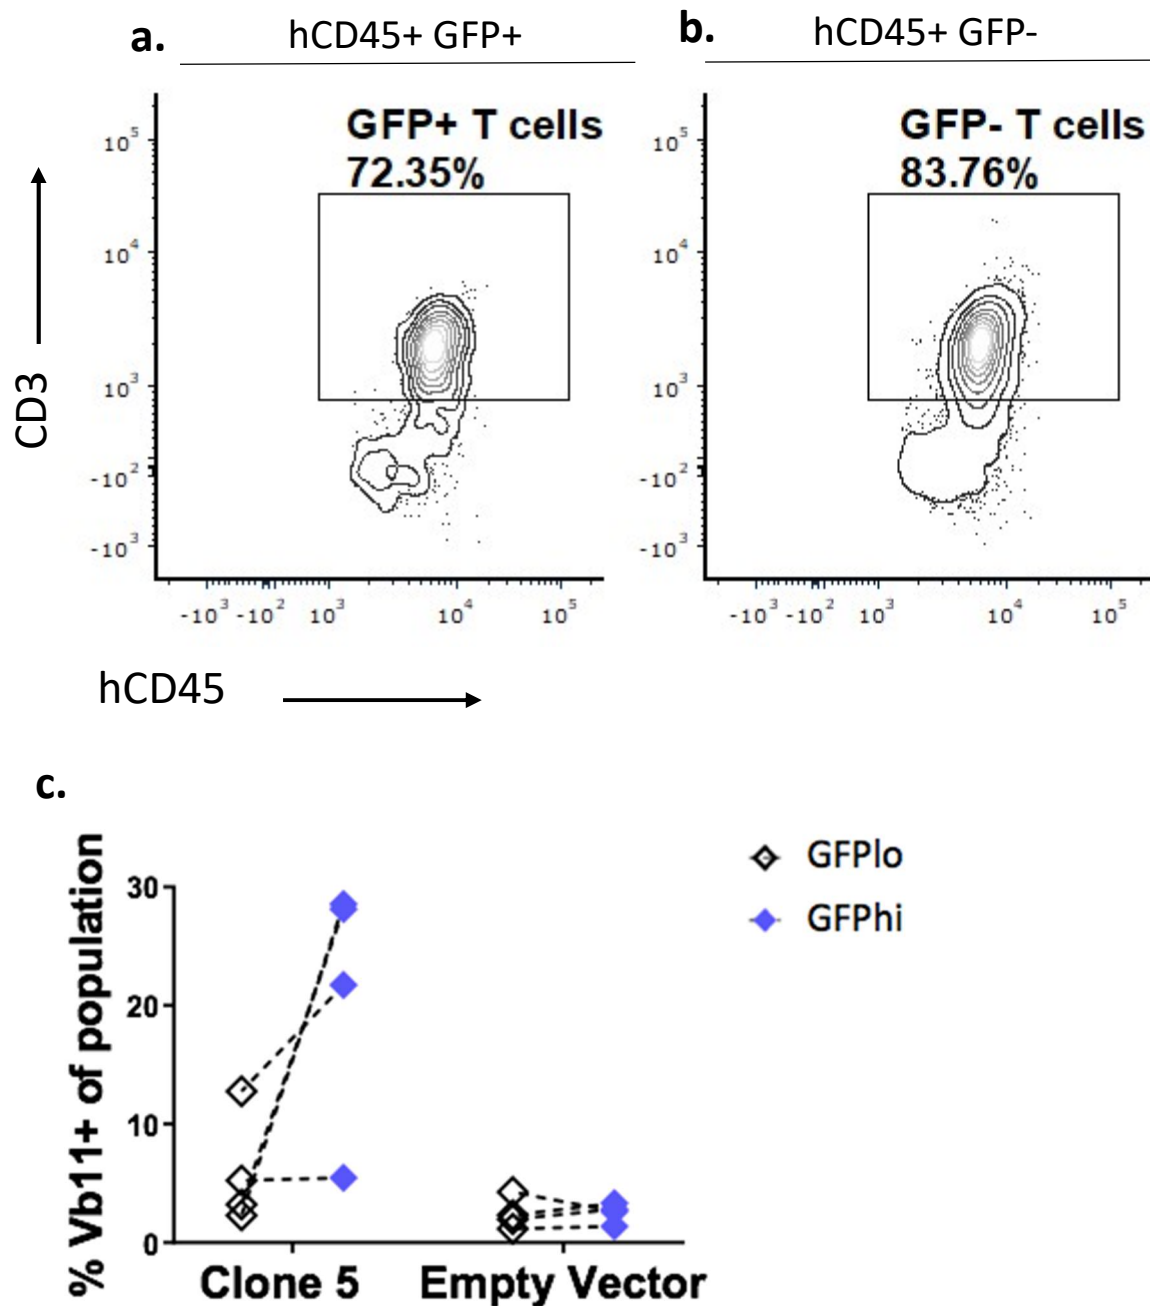

**Supplementary Figure 2. CD3 Expression is seen among human CD45+ cells in GFP+ and GFP- populations but Vb11 levels vary within GFP+ populations.** Representative flow cytometry plots of PBMCs from mice transplanted with Clone 5 transduced cells are shown. CD3 expression within hCD45 is roughly equivalent in GFP+ and GFP- populations. **a.** Expression of CD3 is seen on a subset of hCD45+ cells in GFP+ PBMCs. **b.** Expression of CD3 is seen on a subset of hCD45+ cells in GFP- PBMCs. **c.** Quantification of Vb11 expression in GFP hi and GFP lo CD4+ T cells in the spleen on Clone 5 and EV mice.
